# Supplementary material for: Distinct Clinical Manifestations of Thyroid Cancer After Hematopoietic Stem Cell Transplantation
Source: Springer Nature journal article supplement (doi:10.1245/s10434-019-07442-4), 2019-05-17
Supplement: MOESM2 [file 16732090]

**Supplement table 2. Comparison of thyroid cancer after hematopoietic cell transplantation versus thyroid cancer cohort- case control matching for age**

|  | | | | | | |  | | Thyroid cancer cohort  (N=73) | Thyroid cancer after HCT  (N=16) | p-value |
| --- | --- | --- | --- | --- | --- | --- | --- | --- | --- | --- | --- |
| Age (years) | | | | | | | | | 34.5±11.5 | 32.4±11.9 | 0.509 |
| Presentation | | | | | | | | |  |  | <0.001 |
|  | Palpable mass | | | | | | | | 3 (4.1%) | 7 (43.8%) |  |
|  | Incidentaloma | | | | | | | | 70 (95.9%) | 9 (56.3%) |  |
| Type of cancer | | | | | | | | |  |  | 0.180 |
|  | Papillary | | | | | | | | 73 (100.0%) | 15 (93.8%) |  |
|  | Follicular | | | | | | | | 0 (0%) | 1 (6.3%) |  |
| Operation type | | | | | | | | |  |  | 0.032 |
|  | | Less than TT | | | | | | | 35 (47.9%) | 3 (18.8%) |  |
|  | | TT | | | | | | | 38 (52.1%) | 13 (81.3%) |  |
| Neck node dissection | | | | | | | | |  |  | 0.004 |
|  | | No CCND | | | | | | | 0 (0.0%) | 2 (12.5%) |  |
|  | | CCND | | | | | | | 63 (86.3%) | 10 (62.5%) |  |
|  | | CCND + mRND | | | | | | | 10 (13.7%) | 4 (25.0%) |  |
| Radioactive iodine therapy | | | | | | | | |  |  | <0.001 |
|  | | No | | | | | | | 57 (78.1%) | 5 (31.3%) |  |
|  | | Yes | | | | | | | 16 (21.9%) | 11 (68.8%) |  |
| Tumor size (cm) | | | | | | | | | 0.86±0.67 | 1.61±1.13 | 0.001 |
| Extrathyroidal extension | | | | | | | | |  |  | <0.001 |
|  | | No | | | | | | | 62(84.9%) | 4(25.0%) |  |
|  | | Yes | | | | | | | 11(15.1%) | 12(75.0%) |  |
| Number of tumors | | | | | | | | | 1.7±1.5 | 1.9±1.8 | 0.581 |
| Multiplicity | | | | | | | | |  |  | 0.276 |
|  | | | Single | | | | | | 49(67.1%) | 8 (50.0%) |  |
|  | | | Unilateral | | | | | | 10 (13.7%) | 2 (12.5%) |  |
|  | | | Bilateral | | | | | | 14 (19.2%) | 6 (37.5%) |  |
| Vascular invasion | | | | | | | | |  |  | 0.180 |
|  | | | | No | | | | | 73 (100.0%) | 15 (93.8%) |  |
|  | | | | Yes | | | | | 0(0.0%) | 1 (6.3%) |  |
| Lymphatic invasion | | | | | | | | |  |  | 0.008 |
|  | | | | | No | | | | 54 (74.0%) | 6 (37.5%) |  |
|  | | | | | Yes | | | | 19 (26.0%) | 10 (62.5%) |  |
| Perineural invasion | | | | | | | | |  |  | 0.031 |
|  | | | | | No | | | | 73 (100.0%) | 14 (87.5%) |  |
|  | | | | | Yes | | | | 0 (0.0%) | 2 (12.5%) |  |
| Number of metastatic nodes | | | | | | | | | 2.5±4.6 | 6.3±10.4 | 0.174 |
| T stage | | | | | | | | |  |  | <0.001 |
|  | | | | | | 1 | | | 58 (79.5%) | 4 (25.0%) |  |
|  | | | | | | 2 | | | 3 (4.1%) | 0 (0.0%) |  |
|  | | | | | | 3 | | | 12 (16.4%) | 11 (68.8%) |  |
|  | | | | | | 4 | | | 0 (0.0%) | 1 (6.3%) |  |
| N stage | | | | | | | | |  |  | 0.003 |
|  | | | | | | | | unknown | 0 (0.0%) | 2 (12.5%) |  |
|  | | | | | | | | 0 | 32 (43.8%) | 2 (12.5%) |  |
|  | | | | | | | | 1a | 31 (42.5%) | 8 (50.0%) |  |
|  | | | | | | | | 1b | 10 (13.7%) | 4 (25.0%) |  |
| Distant metastasis | | | | | | | | | 0(0.0%) | 1 (6.3%) | 0.180 |
| Stage | | | | | | | | |  |  | 0.029 |
|  | | | | | | | | I | 68 (93.2%) | 12 (75.0%) |  |
|  | | | | | | | | II | 0 (0.0%) | 1 (6.3%) |  |
|  | | | | | | | | III | 4 (5.5%) | 2 (12.5%) |  |
|  | | | | | | | | IV | 1 (1.4%) | 0 (0.0%) |  |
|  | | | | | | | | unknown | 0 (0.0%) | 1 (6.3%) |  |
| *BRAF* mutation† | | | | | | | | |  |  | 0.037 |
|  | | | | | | | No | | 20 (27.4%) | 6 (60.0%) |  |
|  | | | | | | | Yes | | 53 (72.6%) | 4 (40.0%) |  |

Abbreviations: HCT, Hematopoietic cell transplantation; TT, total thyroidectomy; CCND, central compartment neck dissection; mRND, modified radical neck dissection; *BRAF*, B-Raf proto-oncogene serine/threonine kinase

† *BRAF* mutation was analyzed in only 10 cases of thyroid cancer after HCT
